# Supplementary material for: Vitamin D and non-alcoholic fatty liver disease: a meta-analysis of randomized controlled trials
Source: Royal Society of Chemistry journal article supplement (doi:10.1039/d0fo01095b), 2020-01-01
Supplement: d0fo01095b1.pdf [file d0fo01095b1.pdf]

Supplementary Table 1. Assessment of risk of bias across of the 10 eligible RCTs

| Author, year         | Random sequence generation<br>(selection bias) | Allocation concealment<br>(selection bias) | Blinding of participants and personnel<br>(performance bias) | Blinding of outcome assessment<br>(detection bias) | Incomplete outcome data<br>(attrition bias) | Selective reporting<br>(reporting bias) | Other bias |
|----------------------|------------------------------------------------|--------------------------------------------|--------------------------------------------------------------|----------------------------------------------------|---------------------------------------------|-----------------------------------------|------------|
| Barchetta, 2016      | Low risk                                       | Unclear risk                               | Low risk                                                     | Unclear risk                                       | Low risk                                    | Unclear risk                            | Low risk   |
| Dabbaghmanesh, 2018  | Low risk                                       | Unclear risk                               | Low risk                                                     | Unclear risk                                       | Low risk                                    | Unclear risk                            | Low risk   |
| Dabbaghmanesh, 2018  | Low risk                                       | Unclear risk                               | Low risk                                                     | Unclear risk                                       | Low risk                                    | Unclear risk                            | Low risk   |
| Foroughi, 2014, 2016 | High risk                                      | Unclear risk                               | High risk                                                    | Unclear risk                                       | High risk                                   | Unclear risk                            | High risk  |
| Geier, 2018          | High risk                                      | Unclear risk                               | High risk                                                    | Unclear risk                                       | Low risk                                    | Unclear risk                            | High risk  |
| Lorvand Amiri, 2017  | Low risk                                       | Unclear risk                               | Low risk                                                     | Unclear risk                                       | Low risk                                    | Unclear risk                            | Low risk   |
| Lorvand Amiri, 2016  | High risk                                      | Unclear risk                               | Low risk                                                     | Unclear risk                                       | Low risk                                    | Unclear risk                            | Low risk   |
| Sakpal, 2017         | High risk                                      | Unclear risk                               | High risk                                                    | Unclear risk                                       | High risk                                   | Unclear risk                            | High risk  |
| Sharifi, 2014        | Low risk                                       | Low risk                                   | Low risk                                                     | Unclear risk                                       | Low risk                                    | Unclear risk                            | Low risk   |
| Taghvaei, 2018       | High risk                                      | Unclear risk                               | Low risk                                                     | Unclear risk                                       | Low risk                                    | Unclear risk                            | Low risk   |

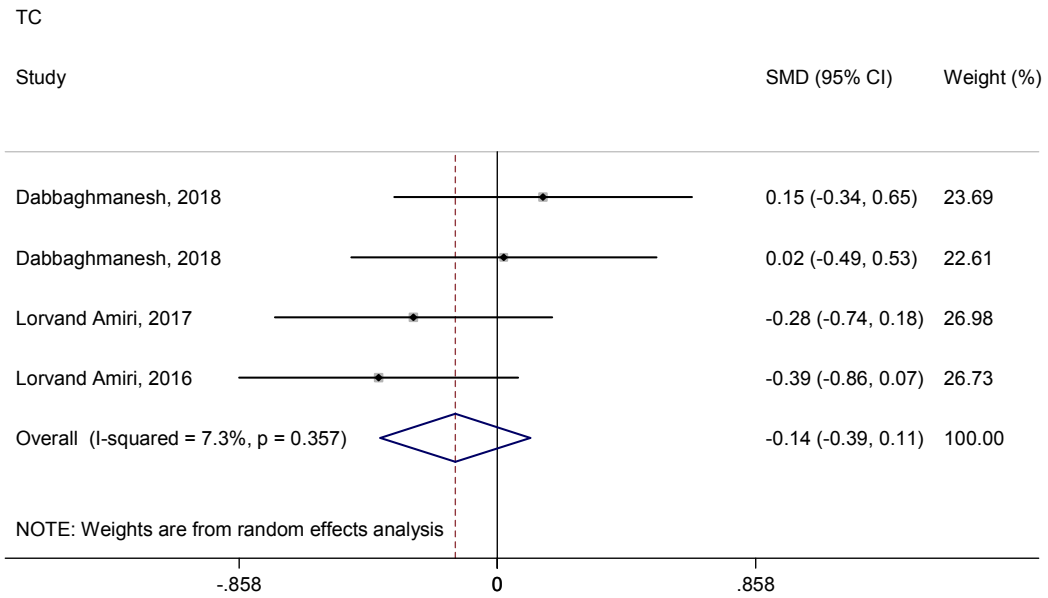

Supplementary Figure 1. Effect of supplemental vitamin D on TC concentrations in NAFLD patients

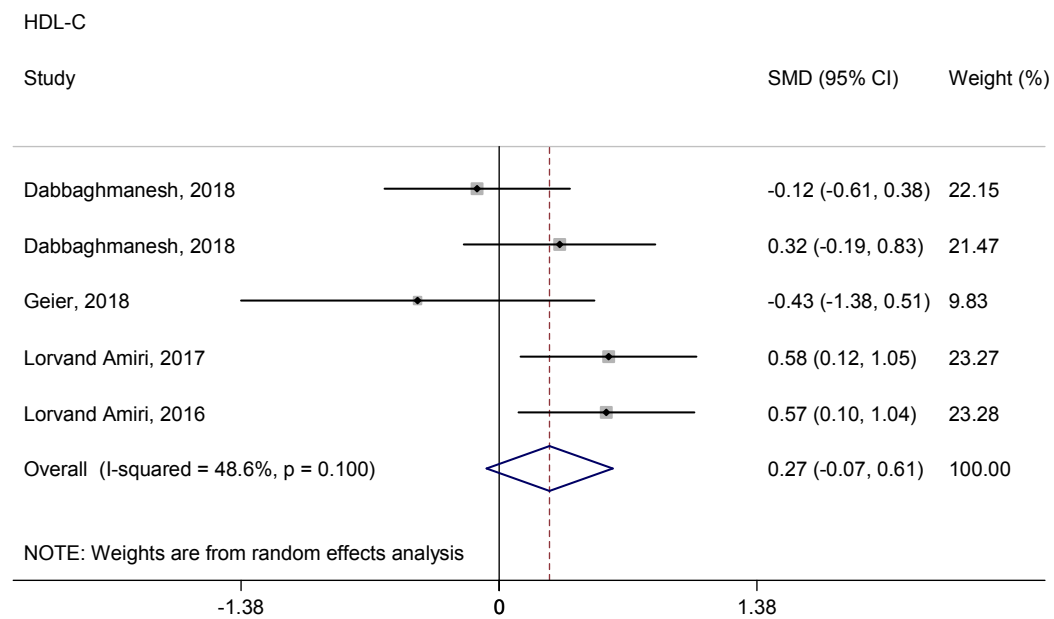

Supplementary Figure 2. Effect of supplemental vitamin D on HDL-C concentrations in NAFLD patients

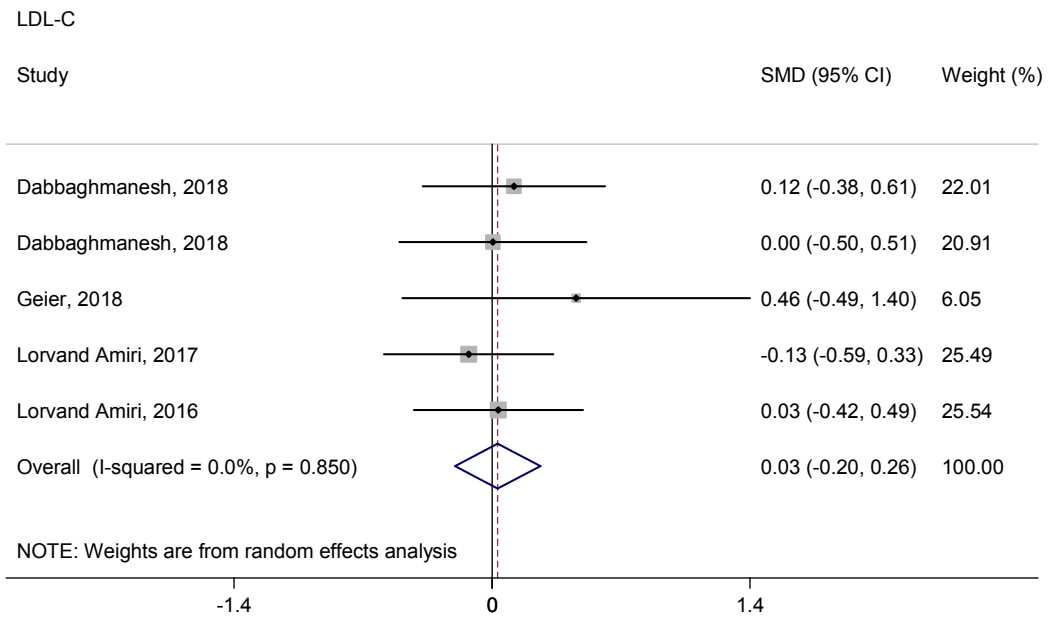

Supplementary Figure 3. Effect of supplemental vitamin D on LDL-C concentrations in NAFLD patients

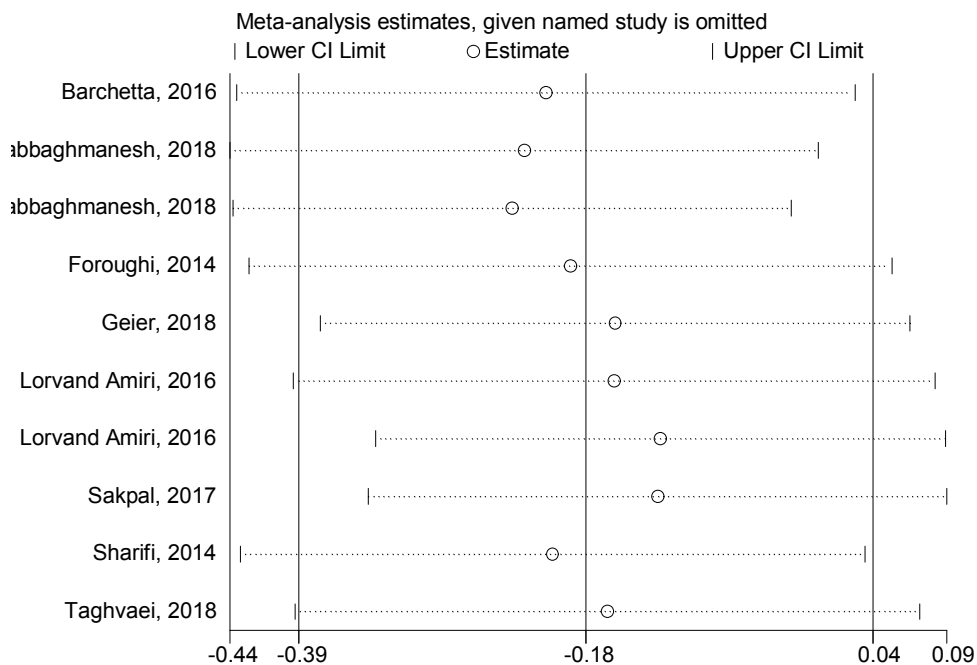

Supplementary Figure 4. Sensitivity analysis of 10 trials evaluating ALT concentrations

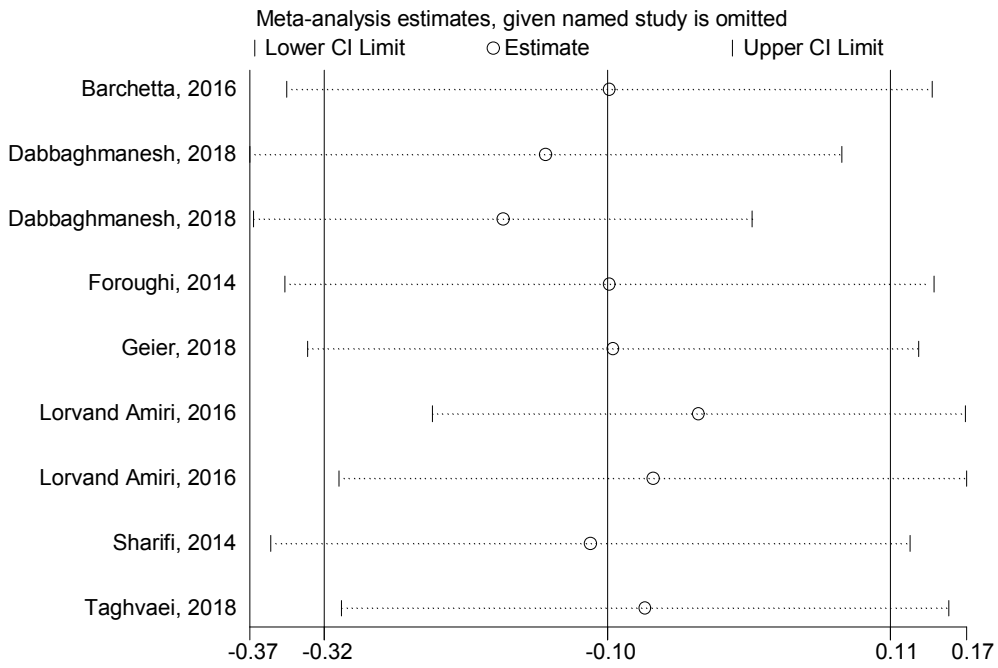

Supplementary Figure 5. Sensitivity analysis of 9 trials evaluating AST concentrations

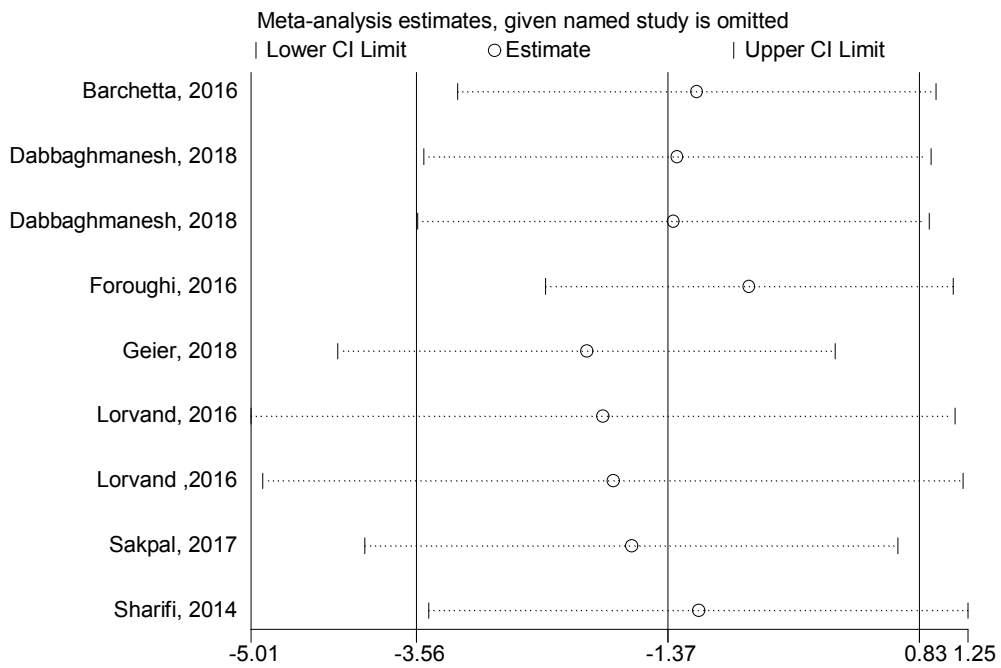

Supplementary Figure 6. Sensitivity analysis of 9 trials evaluating glucose concentrations

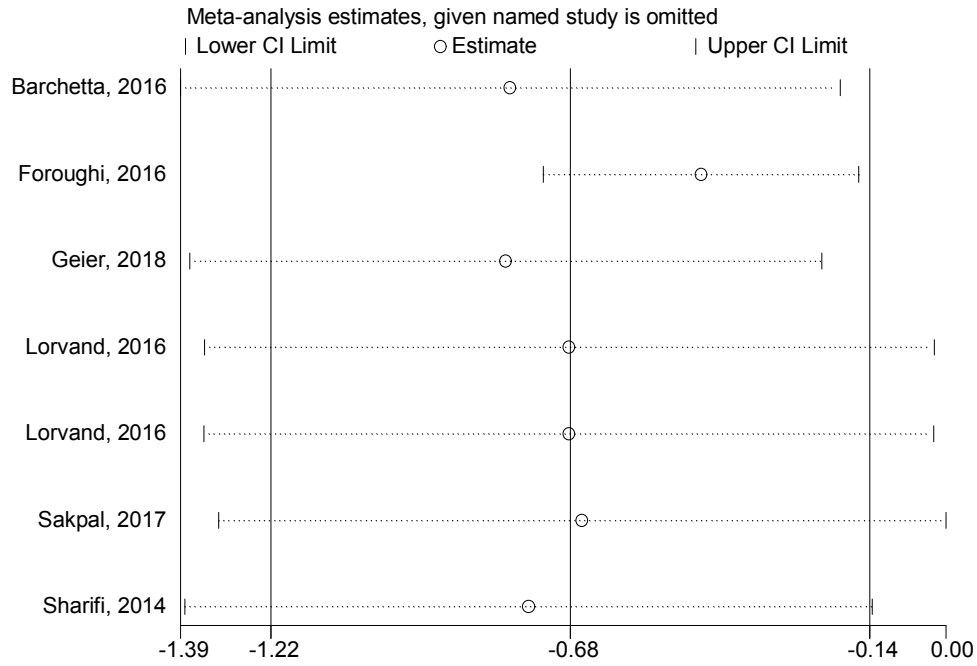

Supplementary Figure 7. Sensitivity analysis of 7 trials evaluating insulin concentrations

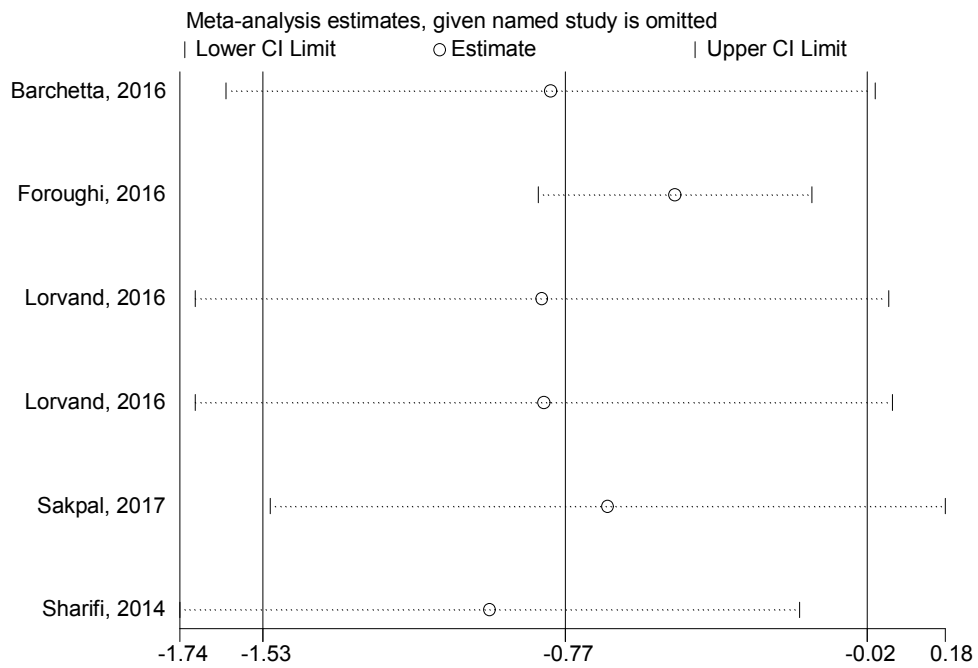

Supplementary Figure 8. Sensitivity analysis of 6 trials evaluating HOMA-IR levels

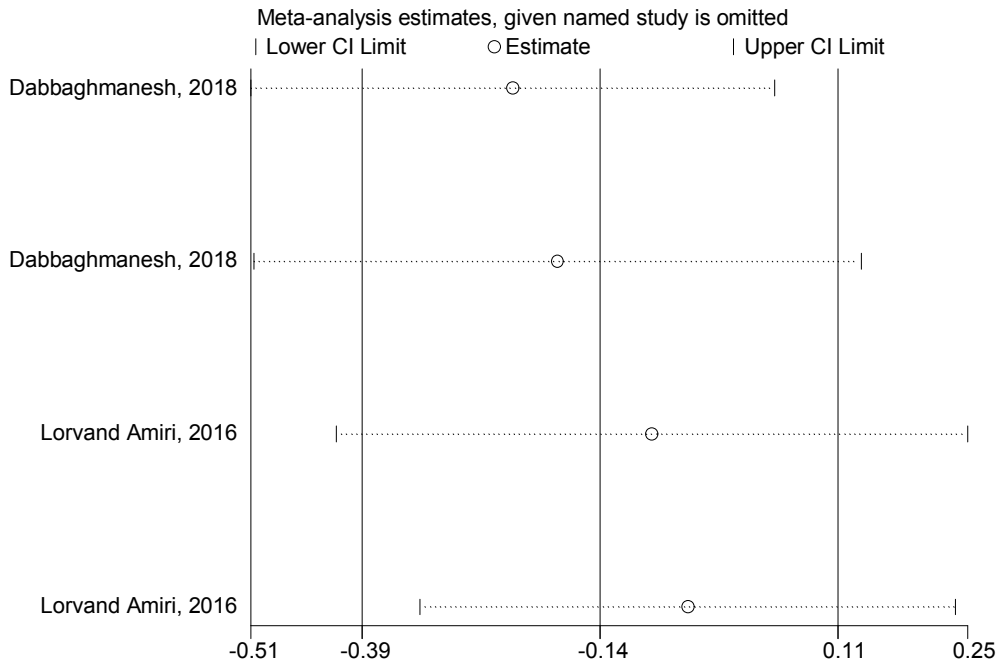

Supplementary Figure 9. Sensitivity analysis of 4 trials evaluating TC concentrations

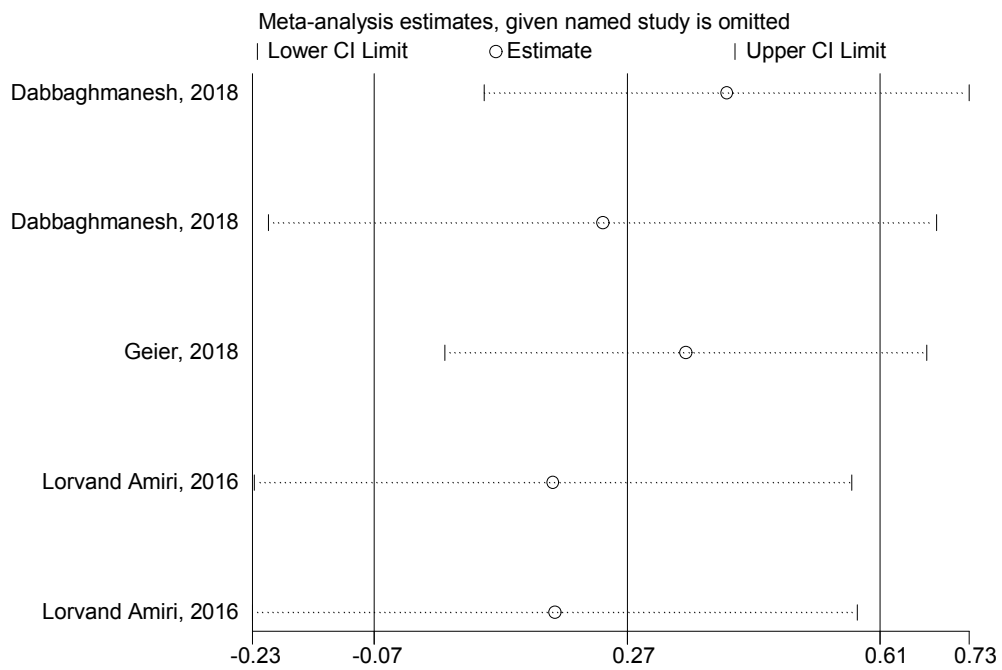

Supplementary Figure 10. Sensitivity analysis of 5 trials evaluating HDL-C concentrations

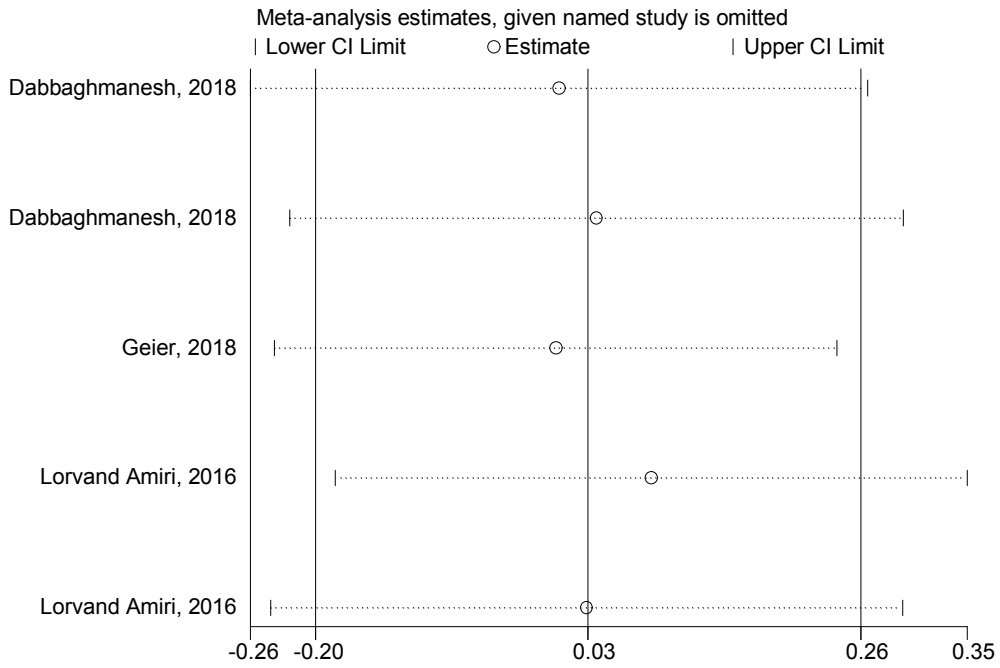

Supplementary Figure 11. Sensitivity analysis of 5 trials evaluating LDL-C concentrations

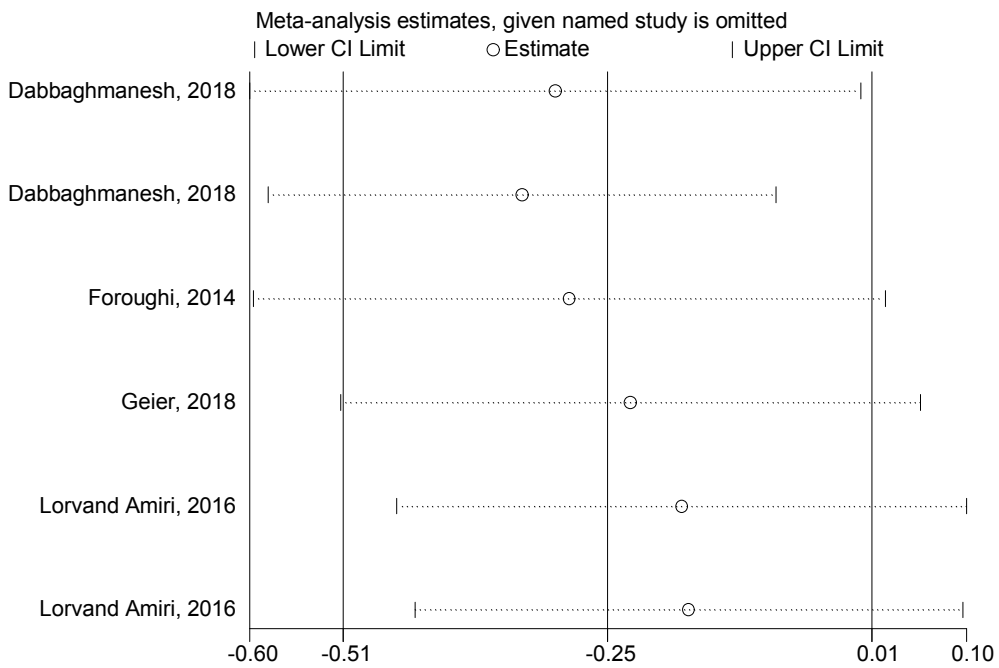

Supplementary Figure 12. Sensitivity analysis of 6 trials evaluating TAG concentrations
